# Supplementary material
Source: Springer Nature journal article supplement (https://www.springermedizin.de/resource/supplementary/12936_2013_2994_MOESM1_ESM.pdf/9544796)
Supplement: MOESM1 [file 9544796]

Number of pharmacies  
in area council  
20

Number of  
pharmacies  
approached  
12

-5 pharmacies  
declined  
-3 pharmacies  
excluded

Two pharmacies  
selected by simple  
random sampling

2 pharmacies  
assigned to  
study arm by a  
toss of a coin

Intervention  
pharmacy  
n=619

Control pharmacy  
n= 607
